# Supplementary material for: Spectroscopy and dynamics of double proton transfer in formic acid dimer
Source: Royal Society of Chemistry journal article supplement (doi:10.1039/c6cp03462d), 2016-01-01
Supplement: c6cp03462d1.pdf [file c6cp03462d1.pdf]

# Electronic Supplementary Information for: Spectroscopy and Dynamics of Double Proton Transfer in Formic Acid Dimer

Kasper Mackeprang,<sup>†</sup> Zhen-Hao Xu,<sup>‡</sup> Zeina Maroun,<sup>†</sup> Markus Meuwly,<sup>\*,‡</sup> and  
Henrik G. Kjaergaard<sup>\*,†</sup>

*Department of Chemistry, University of Copenhagen, Universitetsparken 5, DK-2100  
Copenhagen Ø, Denmark, and Department of Chemistry, University of Basel,  
Klingelbergstrasse 80, 4056 Basel, Switzerland*

E-mail: m.meuwly@unibas.ch; hgk@chem.ku.dk

Phone: +41(0)612673821; +45-35320334. Fax: +41(0)612673855; +45-35320322

---

\*To whom correspondence should be addressed

<sup>†</sup>University of Copenhagen

<sup>‡</sup>University of Basel

# Spectral Subtraction

The ratio between the partial pressure of dimer and monomer,  $p_{\text{dimer}}/p_{\text{monomer}}$ , becomes larger as the total pressure of formic acid (FA) and formic-*d* acid (*d*-FA) increases. As a result, an individual spectrum of the dimer can be obtained by subtraction of a scaled low-pressure spectrum from a high-pressure spectrum as follows:

$$S_{\text{dimer}} = S_H - a \cdot S_L \quad (\text{S1})$$

where  $S_{\text{dimer}}$  is the spectrum of the dimer,  $S_H$  is the high-pressure spectrum,  $S_L$  is the low-pressure spectrum and  $a$  is a scaling factor. The scaling factor is chosen such that monomer features are completely subtracted with a flat baseline to indicate a good subtraction. The pressures at which  $S_H$  and  $S_L$  were recorded as well as the  $a$ -values are summarized in Table S1.

Table S1: The pressures at which the low- and high-pressure spectra were recorded ( $p_L$  and  $p_H$ , respectively) in Torr and the scaling factors used ( $a$ )

|              | $p_L$ | $p_H$ | $a$ |
|--------------|-------|-------|-----|
| FA           | 0.46  | 11    | 3.9 |
| <i>d</i> -FA | 6.4   | 21    | 2.0 |

In Figure S1, the low- and high-pressure spectra of FA (left) and *d*-FA (right) are shown along with the residuals of the subtractions which are the dimer spectra. In the latter, the successful subtractions of the monomers are evident by comparison with the two upper panels. At  $3570 \text{ cm}^{-1}$ , where the OH-stretching band of the monomer is seen in the original spectra, there is now a flat baseline. It can also be seen by the flat baseline in the previous positions of several other bands (e.g. the C-O-H bend at  $641 \text{ cm}^{-1}$ , C-O(H) stretch at  $1105 \text{ cm}^{-1}$ , and the C=O stretch at  $1777 \text{ cm}^{-1}$  of FAM and the O-C=O bend at  $629 \text{ cm}^{-1}$ , D-C-O bend at  $970 \text{ cm}^{-1}$ , C-O(H) stretch at  $1143 \text{ cm}^{-1}$ , and the C=O stretch at  $1760 \text{ cm}^{-1}$  of *d*-FAM). In the performance of these spectral subtractions, it should be kept in mind

that for the spectra to be used for a quantitative purpose, the low-pressure spectrum should be recorded at such a low vapor pressure that the dimer formation is negligible. This is important so as not to reduce the signal of the dimer from the high-pressure spectrum in the subtraction. The disadvantage of using the spectra recorded at extremely low pressure, however, is a low signal to noise ratio. As our focus in this study is purely qualitative, we have chosen to record the low-pressure spectra at more elevated pressures where both monomer and dimer are present, but where the signal to noise ratio is much higher.

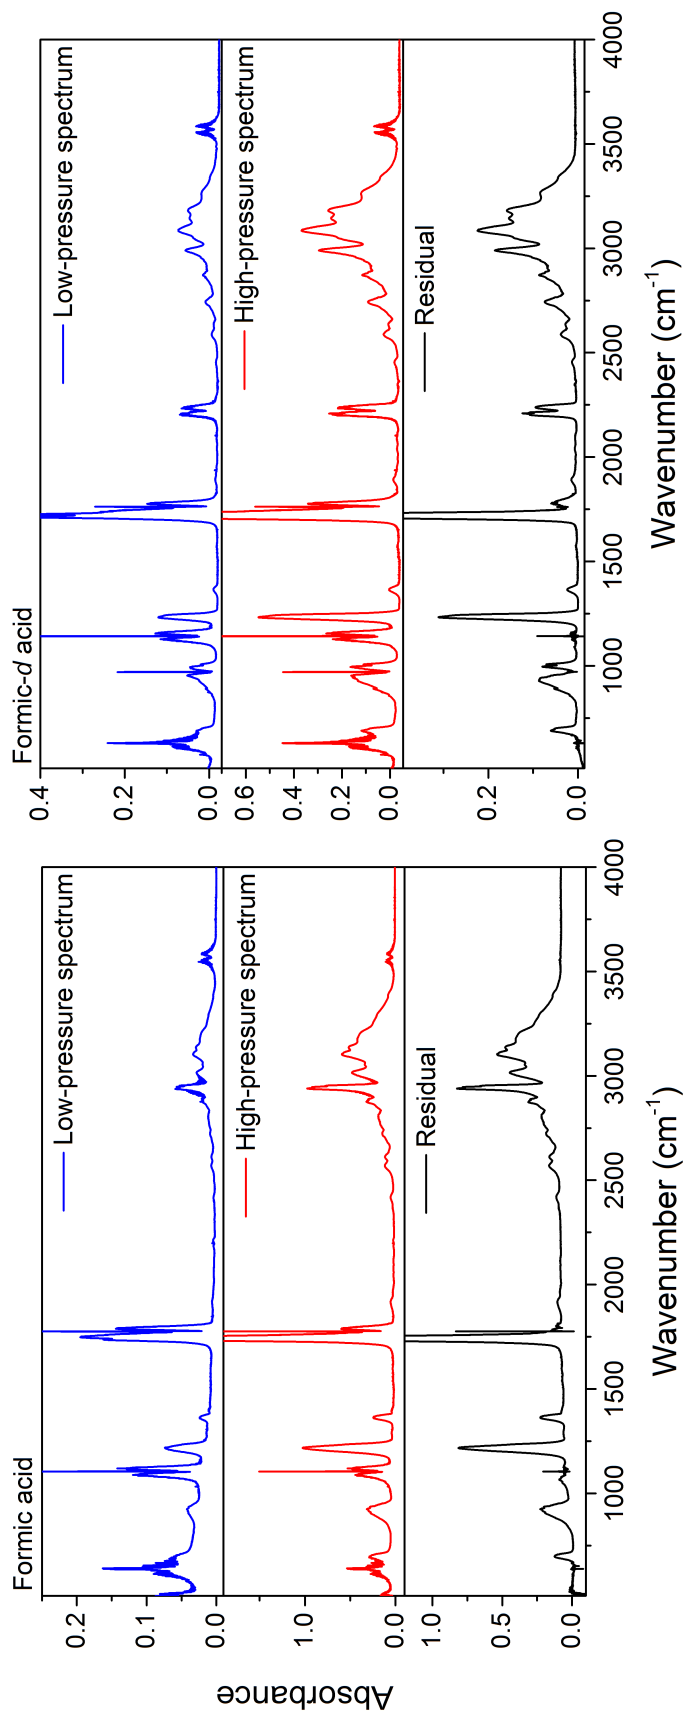

Figure S1: The low-pressure (upper panel) and high-pressure (middle panel) spectra used for the spectral subtractions to obtain the spectra of the dimers (lower panel) of FAD (left) and *d*-FAD (right)

# Computational Details

Table S2: Parameters for MMPT-MP2 and MMPT-B3LYP PESs. See reference ? for details of the implementation.

|            |                              | MMPT-B3LYP       |                  | MMPT-MP2         |                  |
|------------|------------------------------|------------------|------------------|------------------|------------------|
| Parameters |                              | $V_{\text{SDM}}$ | $V_{\text{SSM}}$ | $V_{\text{SDM}}$ | $V_{\text{SSM}}$ |
| $p_1$      | kcal/mol                     | 1338938          | 1338863          | 1339070          | 1338978          |
| $p_2$      | $\text{\AA}^{-1}$            | 0.707            | 1.331            | 0.920            | 1.292            |
| $p_3$      | $\text{\AA}$                 | -10.603          | -5.251           | -7.061           | -4.872           |
| $p_4$      | kcal/mol                     | -1338591         | -1338667         | -1338459         | -1338551         |
| $p_5$      | $\text{\AA}^{-1}$            | 0.537            | -0.792           | 0.685            | -0.645           |
| $p_6$      | $\text{\AA}^{-2}$            | 0.808            | 1.134            | 0.753            | 1.076            |
| $p_7$      | $\text{\AA}$                 | 76.535           | 54.564           | 73.937           | 42.080           |
| $p_8$      | $\text{\AA}^{-1}$            | 2.777            | 2.602            | 2.817            | 2.516            |
| $p_9$      | $\text{\AA}$                 | 0.079            | 0.104            | 0.076            | 0.090            |
| $p_{10}$   | kcal/(mol·deg <sup>2</sup> ) | 0.002            | 0.002            | 0.002            | 0.002            |
| $p_{11}$   | kcal/mol                     | 32.85            | 62.78            | 51.03            | 113.38           |

The functional form of  $V_{\text{SDM}}$  and  $V_{\text{SSM}}$  is  $V(R, \rho, \theta) = V_0(R, \rho) + k\theta^2$  in which?

$$V_0(R, \rho) = D_{eq}(R)[1 - e^{-\beta(R)(\rho - \rho_{eq}(R))}]^2 + D_{eq}(R)[1 - e^{-\beta(R)(1 - \rho - \rho_{eq}(R))}]^2 - D_{eq}(R) - c \quad (\text{S2})$$

Each of the coefficients is fitted to the following parametrizations;

$$\begin{aligned}
 D_{eq}(R) &= p_1[1 - e^{-p_2(R - p_3)}]^2 \\
 \beta(R) &= p_5 + p_6 R \\
 \rho_{eq}(R) &= p_7 e^{-p_8 R} + p_9 \\
 p_{10} &= k, \quad p_{11} = c
 \end{aligned} \quad (\text{S3})$$

## Figures

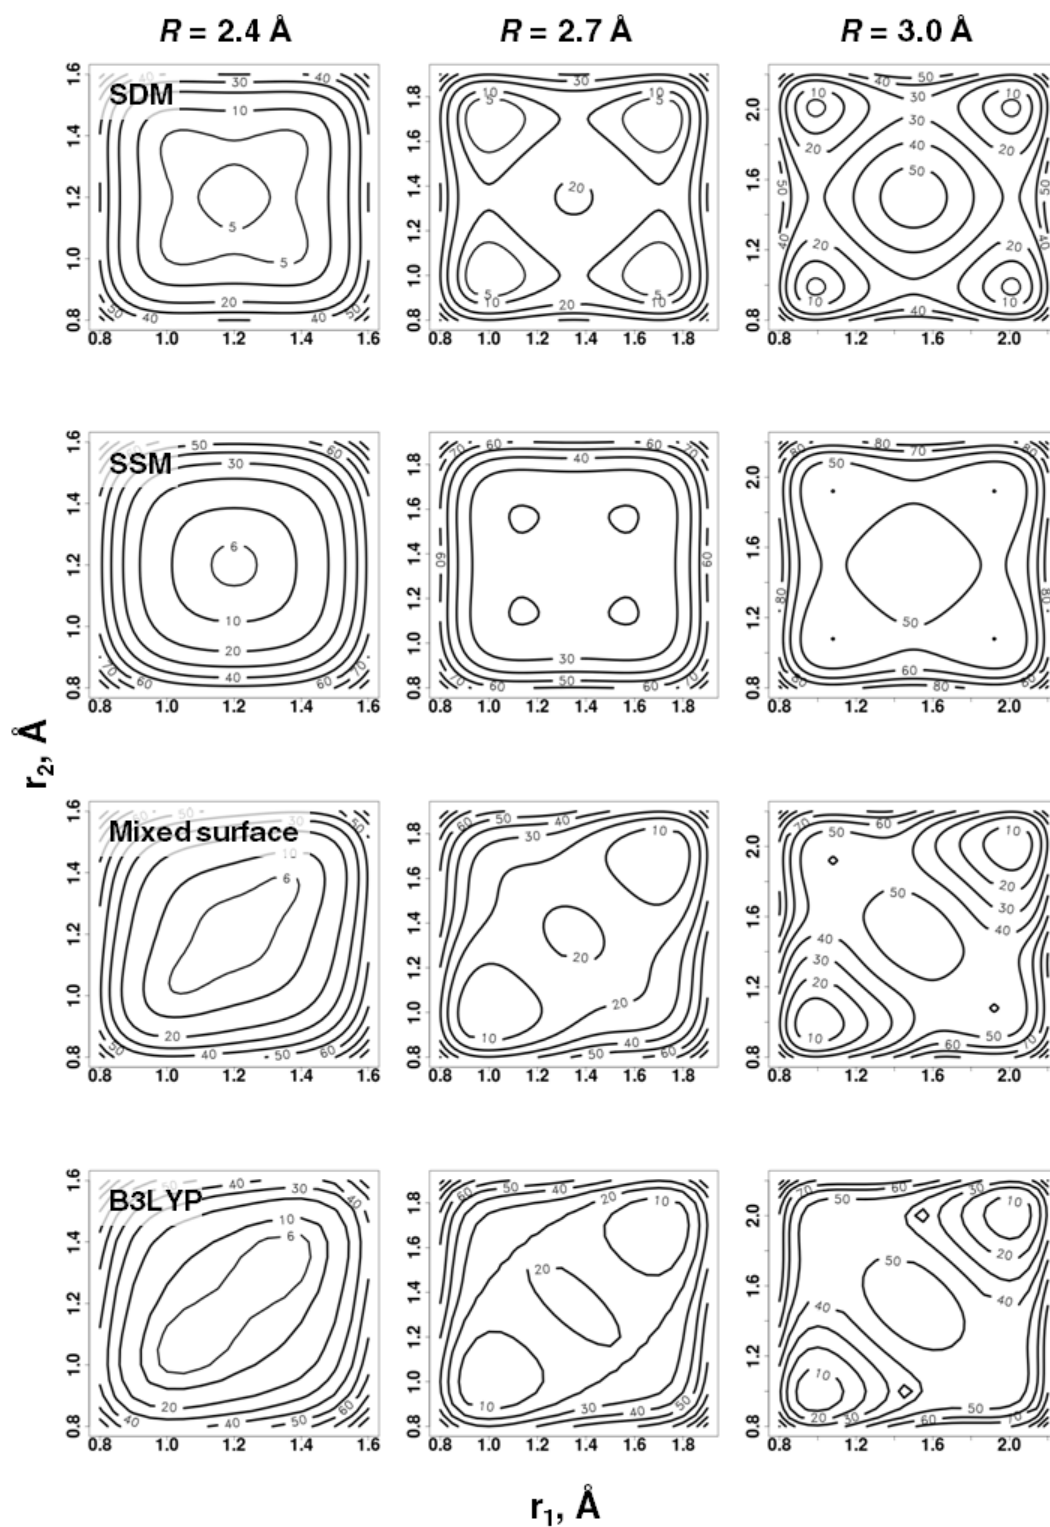

Figure S2: 2D potential energy surfaces for different values of the D–A separation,  $R$  ( $R \in [2.4 \text{ Å}, 2.7 \text{ Å}, 3.0 \text{ Å}]$ ). From top to bottom: the SDM PES, the SSM PES, the mixed MMPT PES and the *ab initio* B3LYP/6-31G(d,p) PES to which the mixed PES was fitted. The energies listed on the contour lines are in  $\text{kcal mol}^{-1}$

Table S3: The fixed point charges for carbons (C), oxygens (O), hydrogens (H), and the transferring hydrogens ( $H_T$ ) from an NBO analysis at the B3LYP/6-31G(d,p) TS structure for computing the dipole moment

| Atom  | Charge ( $e$ ) |
|-------|----------------|
| C     | 0.63           |
| O     | -0.675         |
| H     | 0.2            |
| $H_T$ | 0.52           |

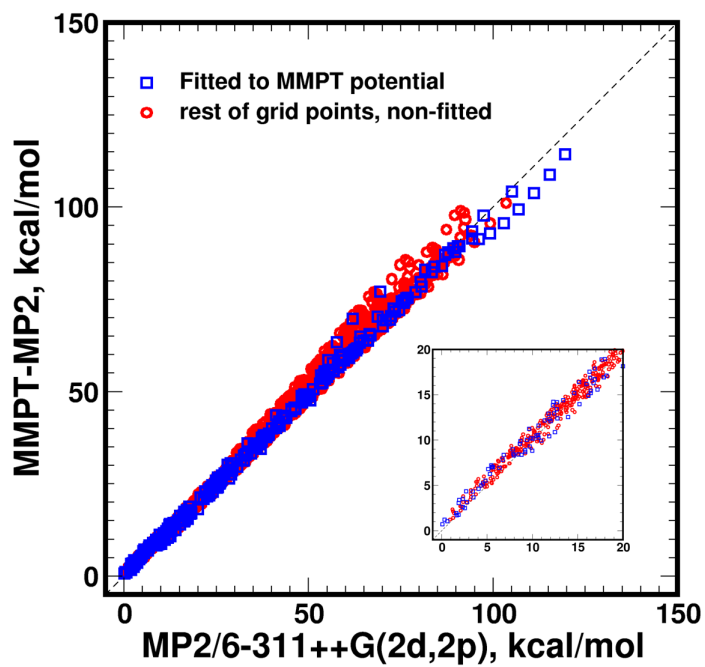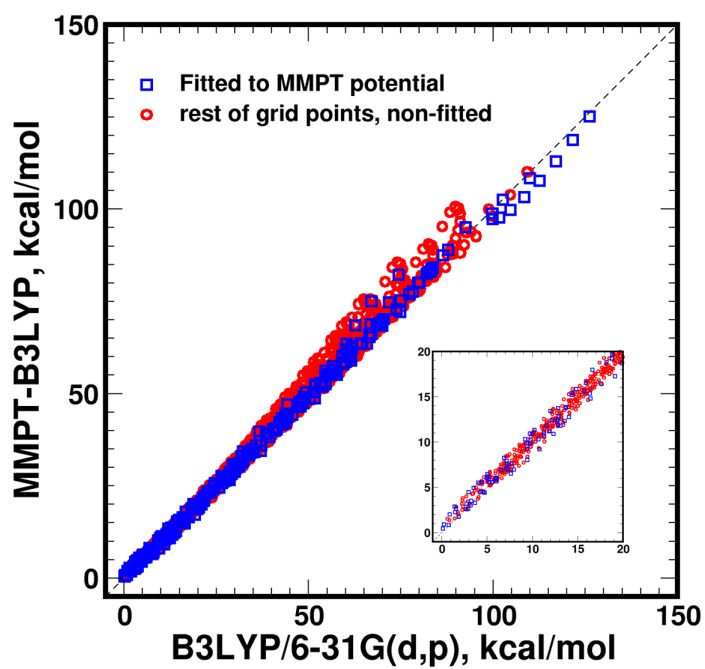

Figure S3: Correlation of potential energy between MMPT, MP2, and B3LYP levels

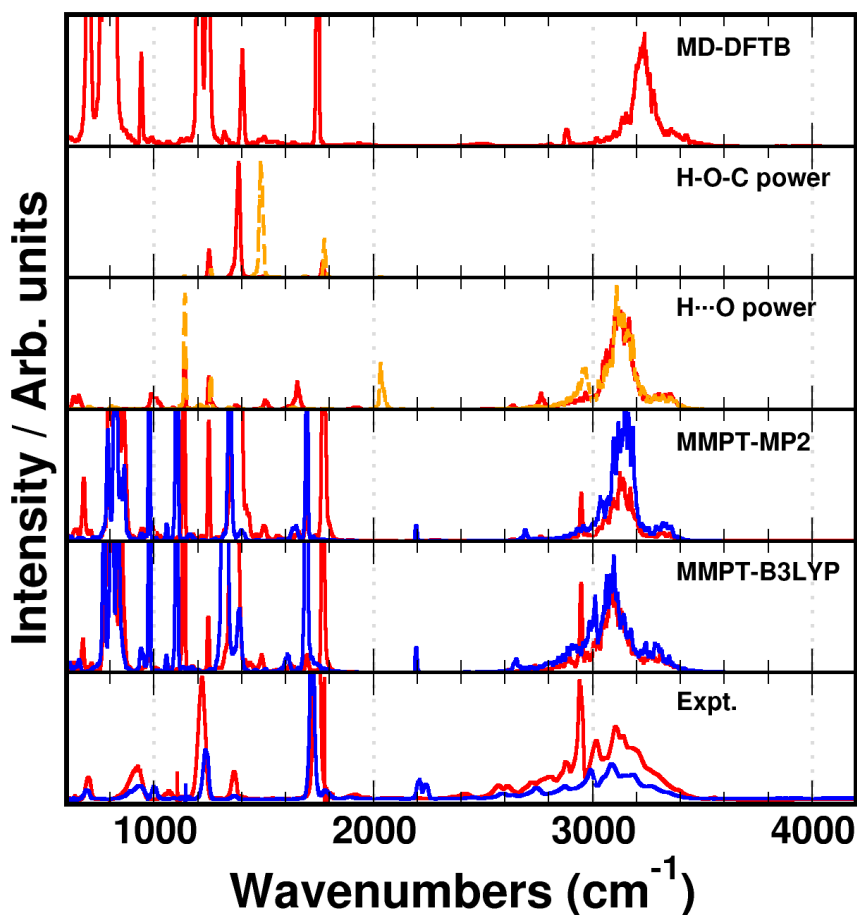

Figure S4: Simulated spectra of FAD (red) and *d*-FAD (blue) obtained from MD simulations (second and third panel from bottom). For the simulations with the MMPT force field the barrier heights were morphed to 5.1 kcal mol<sup>-1</sup> and 7.2 kcal mol<sup>-1</sup> for MMPT-B3LYP and MMPT-MP2, respectively. The HOC- and H···O (H-bond) power spectra from simulations (*d*-FAD) with MMPT-MP2 and two values of the H-bending force constant  $k = 17.5$  kcal mol<sup>-1</sup> rad<sup>-2</sup> (red) and  $k = 33$  kcal mol<sup>-1</sup> rad<sup>-2</sup> (dashed orange) are given in the second and third panel from the top. Note the strong coupling between the H···O power spectrum and other modes. The experimental spectra of FAD and *d*-FAD have been included for comparison.

## References

- ( ) Lammers, S.; Lutz, S.; Meuwly, M. Reactive force fields for proton transfer dynamics. *J. Comput. Chem* **2008**, *29*, 1048–1063.
